# Supplementary material for: A cross-national study on mental health, psychological distress and suicidal ideation among veterinarians in multiple European countries
Source: Frontiers journal article supplement (doi:10.3389/fvets.2025.1634139), 2025-09-15
Supplement: Data_Sheet_2.pdf [file Data_Sheet_2.pdf]

## Supplementary Material

### 1 Supplementary Tables

**Supplementary Table 1.** Associations between selected mental health-related statements and veterinarians' country of origin (n=611).

| Statements (n=31)                                                                                                                          | Pearson's chi-square ( $\chi^2$ ) test |    |              | Cramer's V value | ANOVA   |                              |              |                                                                           |             | Cronbach's $\alpha$ |
|--------------------------------------------------------------------------------------------------------------------------------------------|----------------------------------------|----|--------------|------------------|---------|------------------------------|--------------|---------------------------------------------------------------------------|-------------|---------------------|
|                                                                                                                                            | X-squared                              | df | p value      |                  | F       | df_between, df_within groups | p value      | Tukey HSD                                                                 | 95% CI      |                     |
| Have you been diagnosed with a mental illness?                                                                                             | 54.940                                 | 2  | $p<0.0001^*$ | 0.300            |         |                              |              |                                                                           |             |                     |
| Have you used/are taking medicine for your mental health?                                                                                  | 27.701                                 | 2  | $p<0.0001^*$ | 0.213            |         |                              |              |                                                                           |             |                     |
| Is anyone in your family diagnosed with a mental illness?                                                                                  | 5.186                                  | 2  | $p=0.075$    | 0.092            |         |                              |              |                                                                           |             |                     |
| I personally know a veterinarian who has committed suicide.                                                                                | 0.514                                  | 2  | $p=0.774$    | 0.029            |         |                              |              |                                                                           |             |                     |
| I have heard of a veterinarian who committed suicide.                                                                                      | 9.347                                  | 2  | $p<0.01^*$   | 0.124            |         |                              |              |                                                                           |             |                     |
| The suicide rate is higher among veterinarians than the general population.                                                                | 25.689                                 | 8  | $p<0.01^*$   | 0.145            | 10.715  | 2, 608                       | $p<0.0001^*$ | HU < FI ( $p<0.05^*$ ), HU < SE ( $p<0.0001^*$ ), FI < SE ( $p=0.171$ )   | (4.31–4.45) | 0.746               |
| I have had suicidal thoughts.                                                                                                              | 4.877                                  | 8  | $p=0.771$    | 0.063            | 1.087   | 2, 608                       | $p=0.338$    | HU < FI ( $p=0.325$ ), HU < SE ( $p=0.947$ ), FI > SE ( $p=0.591$ )       | (2.18–2.42) | 0.739               |
| I have seriously considered or tried to commit suicide because I believe that suicide is the only way out of the problems present in life. | 19.006                                 | 8  | $p<0.05^*$   | 0.125            | 2.248   | 2, 608                       | $p=0.107$    | HU < FI ( $p=0.149$ ), HU < SE ( $p=0.198$ ), FI = SE ( $p=1.000$ )       | (1.46–1.64) | 0.745               |
| I feel that having mental health issues makes me unfit to be a veterinary professional.                                                    | 288.941                                | 8  | $p<0.0001^*$ | 0.486            | 220.774 | 2, 608                       | $p<0.0001^*$ | HU < FI ( $p<0.0001^*$ ), HU < SE ( $p<0.0001^*$ ), FI < SE ( $p=0.823$ ) | (2.67–2.89) | 0.766               |
| My role at work has a negative impact on my mental health.                                                                                 | 23.909                                 | 8  | $p<0.01^*$   | 0.140            | 8.138   | 2, 608                       | $p<0.0001^*$ | HU < FI ( $p=0.946$ ), HU < SE ( $p<0.01^*$ ), FI < SE ( $p<0.01^*$ )     | (2.94–3.14) | 0.726               |

Supplementary Material

|                                                                                                                                                                                                                                                       |         |   |              |       |        |        |              |                                                                           |             |       |
|-------------------------------------------------------------------------------------------------------------------------------------------------------------------------------------------------------------------------------------------------------|---------|---|--------------|-------|--------|--------|--------------|---------------------------------------------------------------------------|-------------|-------|
| I feel that performing euthanasia affects me personally.                                                                                                                                                                                              | 30.060  | 8 | $p<0.0001^*$ | 0.157 | 9.332  | 2, 608 | $p<0.0001^*$ | HU > FI ( $p<0.0001^*$ ), HU > SE ( $p=0.098$ ), FI < SE ( $p=0.156$ )    | (2.47–2.67) | 0.750 |
| In my work, I always strive for conscientiousness, accuracy, but I feel that in some cases I am not good enough, so sometimes I get anxious.                                                                                                          | 27.230  | 8 | $p<0.01^*$   | 0.149 | 5.031  | 2, 608 | $p<0.01^*$   | HU < FI ( $p=0.263$ ), HU > SE ( $p=0.171$ ), FI > SE ( $p<0.01^*$ )      | (2.71–2.87) | 0.760 |
| I often go to my workplace anxiously about what to do on a given day (unexpected cases, time-consuming administrative tasks, interventions that take longer than expected).                                                                           | 25.471  | 8 | $p<0.01^*$   | 0.144 | 1.436  | 2, 608 | $p=0.239$    | HU > FI ( $p=0.480$ ), HU < SE ( $p=0.238$ ), FI > SE ( $p=0.843$ )       | (3.83–4.01) | 0.733 |
| I often go to my workplace anxiously because of the manager / co-workers (humiliation, competition, too many people working in one place, disagreements, conflicts, tension).                                                                         | 9.849   | 8 | $p=0.276$    | 0.090 | 0.258  | 2, 608 | $p=0.773$    | HU > FI ( $p=0.760$ ), HU > SE ( $p=0.980$ ), FI < SE ( $p=0.896$ )       | (3.32–3.53) | 0.726 |
| My work has caused me to develop unhealthy habits and tendencies in my personal life.                                                                                                                                                                 | 11.032  | 8 | $p=0.200$    | 0.095 | 2.572  | 2, 608 | $p=0.077$    | HU < FI ( $p=0.213$ ), HU < SE ( $p=0.090$ ), FI < SE ( $p=0.840$ )       | (3.17–3.38) | 0.730 |
| I feel that I can separate my work and private life.                                                                                                                                                                                                  | 157.952 | 8 | $p<0.0001^*$ | 0.360 | 79.702 | 2, 608 | $p<0.0001^*$ | HU < FI ( $p<0.0001^*$ ), HU < SE ( $p<0.0001^*$ ), FI < SE ( $p=0.482$ ) | (2.10–2.30) | 0.747 |
| I often feel I have to go to work even when I am sick or have family emergencies because of the nature of my work.                                                                                                                                    | 36.979  | 8 | $p<0.0001^*$ | 0.246 | 15.599 | 2, 608 | $p<0.0001^*$ | HU < FI ( $p<0.0001^*$ ), HU < SE ( $p<0.0001^*$ ), FI > SE ( $p=0.849$ ) | (3.23–3.44) | 0.741 |
| I often feel isolated from society due to long working hours; I feel like I don't have enough free time and because of this I have to face the consequences (for example not having family responsibilities, not enough time for sports and hobbies). | 26.521  | 8 | $p<0.01^*$   | 0.147 | 3.706  | 2, 608 | $p<0.05^*$   | HU > FI ( $p=0.712$ ), HU > SE ( $p<0.05^*$ ), FI > SE ( $p=0.129$ )      | (1.78–1.96) | 0.739 |
| If I run into an obstacle while working, I'm afraid to ask for help due to what others might think.                                                                                                                                                   | 18.817  | 8 | $p<0.05^*$   | 0.124 | 2.543  | 2, 608 | $p=0.079$    | HU > FI ( $p=0.426$ ), HU > SE ( $p=0.066$ ), FI > SE ( $p=0.527$ )       | (2.18–2.40) | 0.732 |
| I often feel like I don't get enough professional support in the workplace.                                                                                                                                                                           | 13.850  | 8 | $p=0.086$    | 0.106 | 3.978  | 2, 608 | $p<0.05^*$   | HU > FI ( $p<0.05^*$ ), HU > SE ( $p=0.584$ ), FI < SE ( $p=0.270$ )      | (3.28–3.51) | 0.735 |
| Establishing and maintaining (customer) relationships is very important, but I often encounter barriers to communication.                                                                                                                             | 25.846  | 8 | $p<0.01^*$   | 0.145 | 1.869  | 2, 608 | $p=0.155$    | HU < FI ( $p=0.479$ ), HU < SE ( $p=0.140$ ), FI < SE ( $p=0.270$ )       | (2.63–2.84) | 0.736 |

|                                                                                                                                                                                  |        |   |              |       |        |        |              |                                                                                 |             |       |
|----------------------------------------------------------------------------------------------------------------------------------------------------------------------------------|--------|---|--------------|-------|--------|--------|--------------|---------------------------------------------------------------------------------|-------------|-------|
| Animal owners often expect an immediate diagnosis to be made.                                                                                                                    | 32.195 | 8 | $p<0.0001^*$ | 0.163 | 8.827  | 2, 608 | $p<0.0001^*$ | HU > FI ( $p<0.0001^*$ ),<br>HU < SE ( $p<0.01^*$ ), FI<br>< SE ( $p=0.972$ )   | (3.70–3.88) | 0.742 |
| Animal owners often expect a veterinarian to treat animals free of charge just for the sake of animal love and do not allow certain interventions that would benefit the animal. | 37.945 | 8 | $p<0.0001^*$ | 0.176 | 16.132 | 2, 608 | $p<0.0001^*$ | HU < FI ( $p<0.0001^*$ ),<br>HU < SE ( $p<0.0001^*$ ),<br>FI < SE ( $p=0.454$ ) | (3.41–3.59) | 0.739 |
| I feel I picked the right profession when I became a veterinarian.                                                                                                               | 26.719 | 8 | $p<0.01^*$   | 0.148 | 10.426 | 2, 608 | $p<0.0001^*$ | HU < FI ( $p=0.841$ ), HU<br>> SE ( $p<0.0001^*$ ), FI ><br>SE ( $p<0.0001^*$ ) | (3.79–3.96) | 0.779 |
| I often think about whether or not to leave my veterinary career.                                                                                                                | 11.913 | 8 | $p=0.155$    | 0.099 | 4.735  | 2, 608 | $p<0.01^*$   | HU > FI ( $p=0.858$ ), HU<br>> SE ( $p<0.05^*$ ), FI <<br>SE ( $p<0.05^*$ )     | (2.58–2.80) | 0.735 |
| Veterinarians have been under increased stress for the past 10 years.                                                                                                            | 44.568 | 8 | $p<0.0001^*$ | 0.191 | 17.124 | 2, 608 | $p<0.0001^*$ | HU < FI ( $p=0.684$ ), HU<br>< SE ( $p<0.0001^*$ ), FI <<br>SE ( $p<0.0001^*$ ) | (3.78–3.96) | 0.744 |
| The income level and status of the veterinary professions has declined in recent years, and this worries me greatly.                                                             | 29.727 | 8 | $p<0.0001^*$ | 0.156 | 0.287  | 2, 608 | $p=0.750$    | HU > FI ( $p=0.935$ ), HU<br>> SE ( $p=0.729$ ), FI ><br>SE ( $p=0.903$ )       | (3.65–3.83) | 0.745 |
| It's important to keep up with technological and professional developments and practical changes within a particular veterinary field, but I feel it's hard to keep up.          | 13.898 | 8 | $p=0.084$    | 0.107 | 2.437  | 2, 608 | $p=0.088$    | HU < FI ( $p=0.973$ ), HU<br>< SE ( $p=0.097$ ), FI <<br>SE ( $p=0.158$ )       | (2.56–2.74) | 0.736 |
| I would need professional counseling due to stress at work / I use professional counseling due to stress at work.                                                                | 30.756 | 8 | $p<0.0001^*$ | 0.159 | 10.257 | 2, 608 | $p<0.0001^*$ | HU < FI ( $p<0.0001^*$ ),<br>HU < SE ( $p=0.376$ ), FI<br>< SE ( $p<0.05^*$ )   | (3.07–3.30) | 0.725 |
| My government/country has accessible mental health services I could use in case I needed it.                                                                                     | 9.700  | 8 | $p=0.287$    | 0.089 | 1.751  | 2, 608 | $p=0.174$    | HU > FI ( $p=0.153$ ), HU<br>> SE ( $p=0.823$ ), FI <<br>SE ( $p=0.526$ )       | (2.87–3.07) | 0.775 |
| I know how to perform self-care and know how to destress myself if life gets overwhelming.                                                                                       | 32.177 | 8 | $p<0.0001^*$ | 0.162 | 14.933 | 2, 608 | $p<0.0001^*$ | HU > FI ( $p<0.01^*$ ), HU<br>> SE ( $p<0.0001^*$ ), FI ><br>SE ( $p=0.146$ )   | (2.85–3.05) | 0.767 |

An asterisk (\*) denotes a statistically significant association ( $p \leq 0.05$ ). Items 1–5 were dichotomous (yes/no) questions; therefore, ANOVA and Cronbach's alpha were not applicable and have been omitted. Country abbreviations used in Tukey HSD post hoc results: HU = Hungary, FI = Finland, SE = Sweden.

**Supplementary Table 2.** Country-level comparison of veterinarians' opinions on selected mental health-related statements (mean values  $\pm$  SD; n=724).

| Statements (n=26)                                                                                                                                                                                                                  | Total sample (n=724) | Hungary (n=236) | Finland (n=218) | Sweden (n=157)  | Germany (n=77)  | Northern-European countries (n=36) |
|------------------------------------------------------------------------------------------------------------------------------------------------------------------------------------------------------------------------------------|----------------------|-----------------|-----------------|-----------------|-----------------|------------------------------------|
| The suicide rate is higher among veterinarians than the general population.                                                                                                                                                        | 4.43 $\pm$ 0.84      | 4.19 $\pm$ 1.05 | 4.43 $\pm$ 0.77 | 4.59 $\pm$ 0.63 | 4.75 $\pm$ 0.52 | 4.64 $\pm$ 0.59                    |
| I have had suicidal thoughts.                                                                                                                                                                                                      | 2.27 $\pm$ 1.50      | 2.21 $\pm$ 1.52 | 2.42 $\pm$ 1.56 | 2.26 $\pm$ 1.49 | 1.87 $\pm$ 1.34 | 2.58 $\pm$ 1.25                    |
| I have seriously considered or attempted suicide because I believe that suicide is the only way out of the problems present in my life.                                                                                            | 1.52 $\pm$ 1.08      | 1.43 $\pm$ 1.05 | 1.63 $\pm$ 1.17 | 1.63 $\pm$ 1.15 | 1.27 $\pm$ 0.82 | 1.39 $\pm$ 0.77                    |
| I feel that having mental health issues would make me unfit to be a veterinary professional.                                                                                                                                       | 2.37 $\pm$ 1.31      | 1.47 $\pm$ 0.86 | 2.60 $\pm$ 1.27 | 2.73 $\pm$ 1.26 | 3.34 $\pm$ 1.13 | 3.14 $\pm$ 1.22                    |
| My role at work has a negative impact on my mental health.                                                                                                                                                                         | 3.08 $\pm$ 1.26      | 2.90 $\pm$ 1.28 | 2.94 $\pm$ 1.20 | 3.38 $\pm$ 1.28 | 3.22 $\pm$ 1.24 | 3.56 $\pm$ 1.08                    |
| I feel that performing euthanasia affects me personally.                                                                                                                                                                           | 2.65 $\pm$ 1.28      | 2.82 $\pm$ 1.24 | 2.31 $\pm$ 1.26 | 2.55 $\pm$ 1.28 | 3.05 $\pm$ 1.20 | 3.17 $\pm$ 1.25                    |
| In my work, I always strive for conscientiousness, accuracy, but I feel that in some cases I am not performing well enough, so I get anxious.                                                                                      | 3.91 $\pm$ 1.16      | 4.02 $\pm$ 1.25 | 3.89 $\pm$ 1.07 | 3.82 $\pm$ 1.18 | 3.70 $\pm$ 1.11 | 4.19 $\pm$ 1.01                    |
| I often go to my workplace anxious about daily tasks (unexpected cases, time-consuming administrative tasks, interventions that take longer than expected).                                                                        | 3.43 $\pm$ 1.35      | 3.47 $\pm$ 1.36 | 3.38 $\pm$ 1.34 | 3.44 $\pm$ 1.37 | 3.29 $\pm$ 1.41 | 3.86 $\pm$ 1.07                    |
| I often go to my workplace anxiously because of the manager / co-workers (humiliation, competition, too many people working in one place, disagreements, conflicts, tension).                                                      | 2.30 $\pm$ 1.37      | 2.43 $\pm$ 1.50 | 2.27 $\pm$ 1.28 | 2.11 $\pm$ 1.32 | 2.18 $\pm$ 1.28 | 2.72 $\pm$ 1.30                    |
| My work has caused me to develop unhealthy habits and tendencies in my personal life.                                                                                                                                              | 3.34 $\pm$ 1.34      | 3.12 $\pm$ 1.39 | 3.33 $\pm$ 1.29 | 3.41 $\pm$ 1.34 | 3.73 $\pm$ 1.15 | 3.67 $\pm$ 1.41                    |
| I feel that I can separate my work and private life.                                                                                                                                                                               | 2.74 $\pm$ 1.19      | 2.99 $\pm$ 1.14 | 2.72 $\pm$ 1.26 | 2.56 $\pm$ 1.15 | 2.49 $\pm$ 1.17 | 2.50 $\pm$ 1.11                    |
| I often feel I must go to work even when I am sick or have family emergencies because of the nature of my work.                                                                                                                    | 3.42 $\pm$ 1.33      | 2.97 $\pm$ 1.36 | 3.60 $\pm$ 1.26 | 3.52 $\pm$ 1.25 | 2.82 $\pm$ 1.25 | 4.03 $\pm$ 1.21                    |
| I often feel isolated from society due to long work hours; I feel I do not have enough free time and because of this I have to face the consequences (for example not having family time, not enough time for sports and hobbies). | 3.45 $\pm$ 1.40      | 3.56 $\pm$ 1.39 | 3.19 $\pm$ 1.40 | 3.42 $\pm$ 1.43 | 3.75 $\pm$ 1.33 | 3.72 $\pm$ 1.23                    |
| If I run into an obstacle while working, I am afraid to ask for help due to what others might think.                                                                                                                               | 1.92 $\pm$ 1.16      | 1.98 $\pm$ 1.28 | 1.89 $\pm$ 1.16 | 1.66 $\pm$ 0.87 | 2.17 $\pm$ 1.19 | 2.22 $\pm$ 1.15                    |
| I often feel like I do not get enough professional support in the workplace.                                                                                                                                                       | 2.80 $\pm$ 1.35      | 2.61 $\pm$ 1.44 | 2.76 $\pm$ 1.32 | 2.88 $\pm$ 1.27 | 3.14 $\pm$ 1.25 | 3.17 $\pm$ 1.25                    |
| Establishing and maintaining (customer) relationships is very important, but I often encounter barriers in communication.                                                                                                          | 2.71 $\pm$ 1.18      | 2.58 $\pm$ 1.20 | 2.60 $\pm$ 1.13 | 2.83 $\pm$ 1.22 | 3.08 $\pm$ 1.17 | 3.03 $\pm$ 1.08                    |
| Animal owners often expect an immediate diagnosis to be made.                                                                                                                                                                      | 4.34 $\pm$ 0.84      | 4.40 $\pm$ 0.83 | 4.23 $\pm$ 0.85 | 4.17 $\pm$ 0.90 | 4.74 $\pm$ 0.50 | 4.36 $\pm$ 0.87                    |
| Animal owners often expect a veterinarian to treat animals free of charge just for the sake of animal love and do not allow certain interventions that would benefit the animal.                                                   | 3.87 $\pm$ 1.15      | 4.04 $\pm$ 1.13 | 3.62 $\pm$ 1.16 | 3.65 $\pm$ 1.20 | 4.36 $\pm$ 0.87 | 4.14 $\pm$ 1.02                    |
| I feel I picked the right profession when I became a veterinarian.                                                                                                                                                                 | 3.89 $\pm$ 1.09      | 3.97 $\pm$ 1.08 | 4.02 $\pm$ 1.00 | 3.54 $\pm$ 1.18 | 3.97 $\pm$ 1.12 | 3.94 $\pm$ 0.89                    |
| I often consider if I should leave my veterinary career.                                                                                                                                                                           | 2.72 $\pm$ 1.37      | 2.62 $\pm$ 1.40 | 2.56 $\pm$ 1.33 | 2.97 $\pm$ 1.39 | 2.75 $\pm$ 1.39 | 3.22 $\pm$ 1.20                    |
| Veterinarians have been under increased stress for the past 10 years.                                                                                                                                                              | 4.40 $\pm$ 0.86      | 4.25 $\pm$ 1.01 | 4.41 $\pm$ 0.80 | 4.64 $\pm$ 0.65 | 4.39 $\pm$ 0.80 | 4.42 $\pm$ 0.91                    |

|                                                                                                                                                                          |           |           |           |           |           |           |
|--------------------------------------------------------------------------------------------------------------------------------------------------------------------------|-----------|-----------|-----------|-----------|-----------|-----------|
| The income level and status of the veterinary professions has declined in recent years, and this worries me greatly.                                                     | 3.89±1.13 | 3.67±1.27 | 3.76±1.09 | 4.32±0.93 | 3.88±1.08 | 4.25±0.87 |
| It's important to keep up with technological and professional developments and practical changes within a particular veterinary field, but I feel it is hard to keep up. | 3.50±1.16 | 3.18±1.24 | 3.64±1.08 | 3.78±1.00 | 3.48±1.19 | 3.58±1.27 |
| I would need professional counselling due to stress at work/I use professional counselling due to stress at work.                                                        | 3.15±1.42 | 2.93±1.46 | 3.52±1.31 | 3.12±1.46 | 2.74±1.27 | 3.36±1.46 |
| My government/country has accessible mental health services I could use in case I needed it.                                                                             | 2.79±1.36 | 1.66±0.98 | 3.46±1.06 | 3.53±1.14 | 2.75±1.22 | 3.06±1.35 |
| I know how to perform self-care and know how to destress myself if life gets overwhelming.                                                                               | 3.12±1.18 | 3.11±1.23 | 3.29±1.11 | 2.88±1.21 | 3.13±1.09 | 3.14±1.20 |

Note: Responses were given on a 5-point Likert scale, where 1 = strongly disagree and 5 = strongly agree.

Northern-European countries include responses from veterinarians in Estonia, Denmark and Norway.

**Supplementary Table 3.** Veterinarians' opinions on selected mental health-related statements by age and gender (mean values  $\pm$  SD).

| Statements (n=26)                                                                                                                                                                                                                  | Age group           |                     |                      | Gender          |                 |
|------------------------------------------------------------------------------------------------------------------------------------------------------------------------------------------------------------------------------------|---------------------|---------------------|----------------------|-----------------|-----------------|
|                                                                                                                                                                                                                                    | 23-34 years (n=307) | 35-54 years (n=322) | Over 54 years (n=59) | Male (n=77)     | Female (n=606)  |
| The suicide rate is higher among veterinarians than the general population.                                                                                                                                                        | 4.54 $\pm$ 0.72     | 4.42 $\pm$ 0.84     | 3.80 $\pm$ 1.17      | 3.84 $\pm$ 1.25 | 4.49 $\pm$ 0.75 |
| I have had suicidal thoughts.                                                                                                                                                                                                      | 2.55 $\pm$ 1.62     | 2.07 $\pm$ 1.40     | 1.66 $\pm$ 1.15      | 1.92 $\pm$ 1.29 | 2.29 $\pm$ 1.54 |
| I have seriously considered or attempted suicide because I believe that suicide is the only way out of the problems present in my life.                                                                                            | 1.65 $\pm$ 1.20     | 1.44 $\pm$ 1.02     | 1.27 $\pm$ 0.76      | 1.35 $\pm$ 0.85 | 1.54 $\pm$ 1.12 |
| I feel that having mental health issues would make me unfit to be a veterinary professional.                                                                                                                                       | 2.39 $\pm$ 1.31     | 2.31 $\pm$ 1.30     | 2.08 $\pm$ 1.22      | 1.79 $\pm$ 1.22 | 2.40 $\pm$ 1.30 |
| My role at work has a negative impact on my mental health.                                                                                                                                                                         | 3.25 $\pm$ 1.17     | 3.00 $\pm$ 1.30     | 2.36 $\pm$ 1.30      | 2.69 $\pm$ 1.27 | 3.11 $\pm$ 1.26 |
| I feel that performing euthanasia affects me personally.                                                                                                                                                                           | 2.64 $\pm$ 1.25     | 2.63 $\pm$ 1.28     | 2.51 $\pm$ 1.36      | 2.38 $\pm$ 1.21 | 2.65 $\pm$ 1.28 |
| In my work, I always strive for conscientiousness, accuracy, but I feel that in some cases I am not performing well enough, so I get anxious.                                                                                      | 4.17 $\pm$ 1.05     | 3.76 $\pm$ 1.18     | 3.24 $\pm$ 1.32      | 3.14 $\pm$ 1.36 | 3.99 $\pm$ 1.11 |
| I often go to my workplace anxious about daily tasks (unexpected cases, time-consuming administrative tasks, interventions that take longer than expected).                                                                        | 3.64 $\pm$ 1.33     | 3.31 $\pm$ 1.33     | 2.76 $\pm$ 1.41      | 2.87 $\pm$ 1.39 | 3.47 $\pm$ 1.34 |
| I often go to my workplace anxiously because of the manager / co-workers (humiliation, competition, too many people working in one place, disagreements, conflicts, tension).                                                      | 2.36 $\pm$ 1.40     | 2.25 $\pm$ 1.33     | 2.05 $\pm$ 1.44      | 2.08 $\pm$ 1.31 | 2.31 $\pm$ 1.38 |
| My work has caused me to develop unhealthy habits and tendencies in my personal life.                                                                                                                                              | 3.46 $\pm$ 1.27     | 3.35 $\pm$ 1.30     | 2.46 $\pm$ 1.52      | 3.05 $\pm$ 1.38 | 3.35 $\pm$ 1.33 |
| I feel that I can separate my work and private life.                                                                                                                                                                               | 2.69 $\pm$ 1.17     | 2.76 $\pm$ 1.19     | 2.98 $\pm$ 1.37      | 2.97 $\pm$ 1.20 | 2.73 $\pm$ 1.20 |
| I often feel I must go to work even when I am sick or have family emergencies because of the nature of my work.                                                                                                                    | 3.35 $\pm$ 1.34     | 3.47 $\pm$ 1.30     | 3.17 $\pm$ 1.42      | 3.12 $\pm$ 1.24 | 3.42 $\pm$ 1.34 |
| I often feel isolated from society due to long work hours; I feel I do not have enough free time and because of this I have to face the consequences (for example not having family time, not enough time for sports and hobbies). | 3.67 $\pm$ 1.32     | 3.35 $\pm$ 1.41     | 2.64 $\pm$ 1.55      | 2.97 $\pm$ 1.50 | 3.49 $\pm$ 1.39 |
| If I run into an obstacle while working, I am afraid to ask for help due to what others might think.                                                                                                                               | 2.05 $\pm$ 1.23     | 1.78 $\pm$ 1.08     | 1.78 $\pm$ 1.10      | 1.66 $\pm$ 1.02 | 1.93 $\pm$ 1.16 |
| I often feel like I do not get enough professional support in the workplace.                                                                                                                                                       | 2.88 $\pm$ 1.32     | 2.75 $\pm$ 1.36     | 2.44 $\pm$ 1.39      | 2.56 $\pm$ 1.30 | 2.81 $\pm$ 1.35 |
| Establishing and maintaining (customer) relationships is very important, but I often encounter barriers in communication.                                                                                                          | 2.81 $\pm$ 1.20     | 2.69 $\pm$ 1.16     | 2.17 $\pm$ 1.16      | 2.38 $\pm$ 1.17 | 2.73 $\pm$ 1.18 |
| Animal owners often expect an immediate diagnosis to be made.                                                                                                                                                                      | 4.47 $\pm$ 0.74     | 4.31 $\pm$ 0.82     | 3.74 $\pm$ 1.10      | 4.06 $\pm$ 1.00 | 4.36 $\pm$ 0.81 |
| Animal owners often expect a veterinarian to treat animals free of charge just for the sake of animal love and do not allow certain interventions that would benefit the animal.                                                   | 4.05 $\pm$ 1.09     | 3.74 $\pm$ 1.18     | 3.45 $\pm$ 1.20      | 3.52 $\pm$ 1.34 | 3.90 $\pm$ 1.12 |
| I feel I picked the right profession when I became a veterinarian.                                                                                                                                                                 | 3.72 $\pm$ 1.13     | 3.94 $\pm$ 1.08     | 4.47 $\pm$ 0.75      | 4.21 $\pm$ 0.96 | 3.85 $\pm$ 1.10 |
| I often consider if I should leave my veterinary career.                                                                                                                                                                           | 2.91 $\pm$ 1.39     | 2.64 $\pm$ 1.33     | 1.92 $\pm$ 1.26      | 2.19 $\pm$ 1.30 | 2.75 $\pm$ 1.37 |

|                                                                                                                                                                          |           |           |           |           |           |
|--------------------------------------------------------------------------------------------------------------------------------------------------------------------------|-----------|-----------|-----------|-----------|-----------|
| Veterinarians have been under increased stress for the past 10 years.                                                                                                    | 4.49±0.73 | 4.41±0.89 | 3.92±1.16 | 3.84±1.17 | 4.47±0.79 |
| The income level and status of the veterinary professions has declined in recent years, and this worries me greatly.                                                     | 3.94±1.12 | 3.87±1.14 | 3.51±1.21 | 3.40±1.38 | 3.93±1.10 |
| It's important to keep up with technological and professional developments and practical changes within a particular veterinary field, but I feel it is hard to keep up. | 3.42±1.22 | 3.59±1.06 | 3.41±1.25 | 2.99±1.16 | 3.56±1.14 |
| I would need professional counselling due to stress at work/I use professional counselling due to stress at work.                                                        | 3.36±1.35 | 3.06±1.40 | 2.46±1.59 | 2.26±1.33 | 3.24±1.38 |
| My government/country has accessible mental health services I could use in case I needed it.                                                                             | 2.62±1.30 | 2.87±1.38 | 3.14±1.43 | 2.44±1.39 | 2.83±1.35 |
| I know how to perform self-care and know how to destress myself if life gets overwhelming.                                                                               | 2.91±1.13 | 3.18±1.18 | 3.83±1.16 | 3.27±1.26 | 3.09±1.17 |

Note: Responses were given on a 5-point Likert scale, where 1 = strongly disagree and 5 = strongly agree.

**Supplementary Table 4.** Veterinarians' opinions on selected mental health-related statements by working hours, position and holidays (mean values  $\pm$  SD).

| Statements (n=26)                                                                                                                                                                                                                  | Working hours            |                          | Position                       |                                          | Holidays                 |                              |                           |
|------------------------------------------------------------------------------------------------------------------------------------------------------------------------------------------------------------------------------------|--------------------------|--------------------------|--------------------------------|------------------------------------------|--------------------------|------------------------------|---------------------------|
|                                                                                                                                                                                                                                    | Weekly <40 hours (n=345) | Weekly >40 hours (n=335) | Owner/manager position (n=194) | Employee/non-managerial position (n=458) | <14 days per year (n=69) | 14-28 days per years (n=315) | >28 days per year (n=304) |
| The suicide rate is higher among veterinarians than the general population.                                                                                                                                                        | 4.39 $\pm$ 0.87          | 4.46 $\pm$ 0.82          | 4.28 $\pm$ 0.98                | 4.50 $\pm$ 0.76                          | 4.45 $\pm$ 0.90          | 4.42 $\pm$ 0.84              | 4.42 $\pm$ 0.84           |
| I have had suicidal thoughts.                                                                                                                                                                                                      | 2.23 $\pm$ 1.52          | 2.26 $\pm$ 1.50          | 1.84 $\pm$ 1.31                | 2.41 $\pm$ 1.55                          | 2.45 $\pm$ 1.60          | 2.31 $\pm$ 1.53              | 2.14 $\pm$ 1.47           |
| I have seriously considered or attempted suicide because I believe that suicide is the only way out of the problems present in my life.                                                                                            | 1.52 $\pm$ 1.15          | 1.51 $\pm$ 1.02          | 1.30 $\pm$ 0.84                | 1.57 $\pm$ 1.13                          | 1.71 $\pm$ 1.23          | 1.53 $\pm$ 1.11              | 1.47 $\pm$ 1.05           |
| I feel that having mental health issues would make me unfit to be a veterinary professional.                                                                                                                                       | 2.23 $\pm$ 1.28          | 2.43 $\pm$ 1.32          | 2.06 $\pm$ 1.29                | 2.48 $\pm$ 1.28                          | 1.90 $\pm$ 1.20          | 2.35 $\pm$ 1.33              | 2.39 $\pm$ 1.28           |
| My role at work has a negative impact on my mental health.                                                                                                                                                                         | 2.92 $\pm$ 1.25          | 3.19 $\pm$ 1.26          | 2.71 $\pm$ 1.26                | 3.21 $\pm$ 1.24                          | 3.38 $\pm$ 1.27          | 3.12 $\pm$ 1.24              | 2.92 $\pm$ 1.27           |
| I feel that performing euthanasia affects me personally.                                                                                                                                                                           | 2.57 $\pm$ 1.29          | 2.68 $\pm$ 1.26          | 2.46 $\pm$ 1.22                | 2.70 $\pm$ 1.27                          | 2.94 $\pm$ 1.22          | 2.68 $\pm$ 1.25              | 2.49 $\pm$ 1.29           |
| In my work, I always strive for conscientiousness, accuracy, but I feel that in some cases I am not performing well enough, so I get anxious.                                                                                      | 3.99 $\pm$ 1.13          | 3.78 $\pm$ 1.20          | 3.37 $\pm$ 1.29                | 4.13 $\pm$ 1.01                          | 4.12 $\pm$ 1.17          | 4.05 $\pm$ 1.08              | 3.68 $\pm$ 1.22           |
| I often go to my workplace anxious about daily tasks (unexpected cases, time-consuming administrative tasks, interventions that take longer than expected).                                                                        | 3.36 $\pm$ 1.38          | 3.46 $\pm$ 1.35          | 2.94 $\pm$ 1.38                | 3.65 $\pm$ 1.28                          | 3.83 $\pm$ 1.29          | 3.55 $\pm$ 1.29              | 3.17 $\pm$ 1.40           |
| I often go to my workplace anxiously because of the manager / co-workers (humiliation, competition, too many people working in one place, disagreements, conflicts, tension).                                                      | 2.20 $\pm$ 1.36          | 2.36 $\pm$ 1.37          | 1.83 $\pm$ 1.15                | 2.50 $\pm$ 1.42                          | 2.45 $\pm$ 1.49          | 2.38 $\pm$ 1.39              | 2.14 $\pm$ 1.32           |
| My work has caused me to develop unhealthy habits and tendencies in my personal life.                                                                                                                                              | 3.05 $\pm$ 1.35          | 3.61 $\pm$ 1.25          | 3.02 $\pm$ 1.36                | 3.47 $\pm$ 1.29                          | 3.65 $\pm$ 1.34          | 3.40 $\pm$ 1.30              | 3.17 $\pm$ 1.35           |
| I feel that I can separate my work and private life.                                                                                                                                                                               | 3.00 $\pm$ 1.16          | 2.50 $\pm$ 1.18          | 2.90 $\pm$ 1.22                | 2.69 $\pm$ 1.18                          | 2.57 $\pm$ 1.18          | 2.71 $\pm$ 1.14              | 2.83 $\pm$ 1.25           |
| I often feel I must go to work even when I am sick or have family emergencies because of the nature of my work.                                                                                                                    | 3.16 $\pm$ 1.35          | 3.62 $\pm$ 1.26          | 3.38 $\pm$ 1.35                | 3.41 $\pm$ 1.32                          | 3.67 $\pm$ 1.32          | 3.41 $\pm$ 1.30              | 3.30 $\pm$ 1.35           |
| I often feel isolated from society due to long work hours; I feel I do not have enough free time and because of this I have to face the consequences (for example not having family time, not enough time for sports and hobbies). | 2.93 $\pm$ 1.39          | 3.96 $\pm$ 1.23          | 3.11 $\pm$ 1.51                | 3.59 $\pm$ 1.33                          | 3.94 $\pm$ 1.29          | 3.63 $\pm$ 1.36              | 3.11 $\pm$ 1.41           |
| If I run into an obstacle while working, I am afraid to ask for help due to what others might think.                                                                                                                               | 1.87 $\pm$ 1.19          | 1.91 $\pm$ 1.11          | 1.63 $\pm$ 1.03                | 2.03 $\pm$ 1.19                          | 2.17 $\pm$ 1.29          | 2.01 $\pm$ 1.21              | 1.73 $\pm$ 1.04           |



|                                                                                                                                                                                  |           |           |           |           |           |           |           |
|----------------------------------------------------------------------------------------------------------------------------------------------------------------------------------|-----------|-----------|-----------|-----------|-----------|-----------|-----------|
| I often feel like I do not get enough professional support in the workplace.                                                                                                     | 2.56±1.35 | 2.97±1.30 | 2.36±1.30 | 2.95±1.33 | 2.99±1.50 | 2.80±1.36 | 2.71±1.30 |
| Establishing and maintaining (customer) relationships is very important, but I often encounter barriers in communication.                                                        | 2.70±1.20 | 2.69±1.17 | 2.36±1.14 | 2.86±1.19 | 2.86±1.09 | 2.86±1.22 | 2.49±1.15 |
| Animal owners often expect an immediate diagnosis to be made.                                                                                                                    | 4.33±0.82 | 4.34±0.86 | 4.13±1.00 | 4.42±0.74 | 4.39±0.79 | 4.44±0.80 | 4.21±0.87 |
| Animal owners often expect a veterinarian to treat animals free of charge just for the sake of animal love and do not allow certain interventions that would benefit the animal. | 3.83±1.14 | 3.87±1.18 | 3.61±1.25 | 3.96±1.09 | 4.04±1.17 | 4.02±1.06 | 3.64±1.21 |
| I feel I picked the right profession when I became a veterinarian.                                                                                                               | 3.90±1.09 | 3.88±1.11 | 4.24±0.92 | 3.71±1.14 | 3.74±1.20 | 3.79±1.12 | 4.03±1.03 |
| I often consider if I should leave my veterinary career.                                                                                                                         | 2.66±1.36 | 2.73±1.39 | 2.33±1.31 | 2.89±1.37 | 2.80±1.45 | 2.81±1.37 | 2.55±1.36 |
| Veterinarians have been under increased stress for the past 10 years.                                                                                                            | 4.41±0.86 | 4.41±0.87 | 4.24±1.02 | 4.49±0.75 | 4.41±0.79 | 4.43±0.86 | 4.38±0.88 |
| The income level and status of the veterinary professions has declined in recent years, and this worries me greatly.                                                             | 3.89±1.11 | 3.85±1.18 | 3.61±1.26 | 3.99±1.07 | 3.67±1.22 | 4.01±1.11 | 3.78±1.15 |
| It's important to keep up with technological and professional developments and practical changes within a particular veterinary field, but I feel it is hard to keep up.         | 3.46±1.18 | 3.55±1.12 | 3.36±1.12 | 3.55±1.16 | 3.59±1.28 | 3.47±1.17 | 3.50±1.12 |
| I would need professional counselling due to stress at work/I use professional counselling due to stress at work.                                                                | 3.09±1.44 | 3.18±1.39 | 2.72±1.46 | 3.33±1.34 | 3.43±1.32 | 3.20±1.40 | 3.01±1.44 |
| My government/country has accessible mental health services I could use in case I needed it.                                                                                     | 2.75±1.39 | 2.84±1.32 | 2.71±1.42 | 2.81±1.34 | 1.77±0.96 | 2.50±1.32 | 3.30±1.26 |
| I know how to perform self-care and know how to destress myself if life gets overwhelming.                                                                                       | 3.21±1.18 | 3.02±1.17 | 3.49±1.13 | 2.96±1.16 | 2.75±1.22 | 3.02±1.15 | 3.30±1.18 |

Note: Responses were given on a 5-point Likert scale, where 1 = strongly disagree and 5 = strongly agree.
